# Supplementary material for: Genetic Testing for Chronic Kidney Diseases: Clinical Utility and Barriers Perceived by Nephrologists
Source: PubMed Central journal article supplement (PMC8664736; doi:10.1016/j.xkme.2021.08.006), 2021-10-05
Supplement: mmc1.pdf [file mmc1.pdf]

**Figure S1: Genetic Test ordering trends among U.S. nephrologists stratified by Region and Institution type**

Reported number of tests ordered per month were stratified by the either US Region (specified in Table S1, or by Institution type) as indicated by each respondent (n= 149). Differences in mean number of tests were not significant ( $p > 0.05$ ) for all comparisons as determined by Kruskal-Wallis Test.

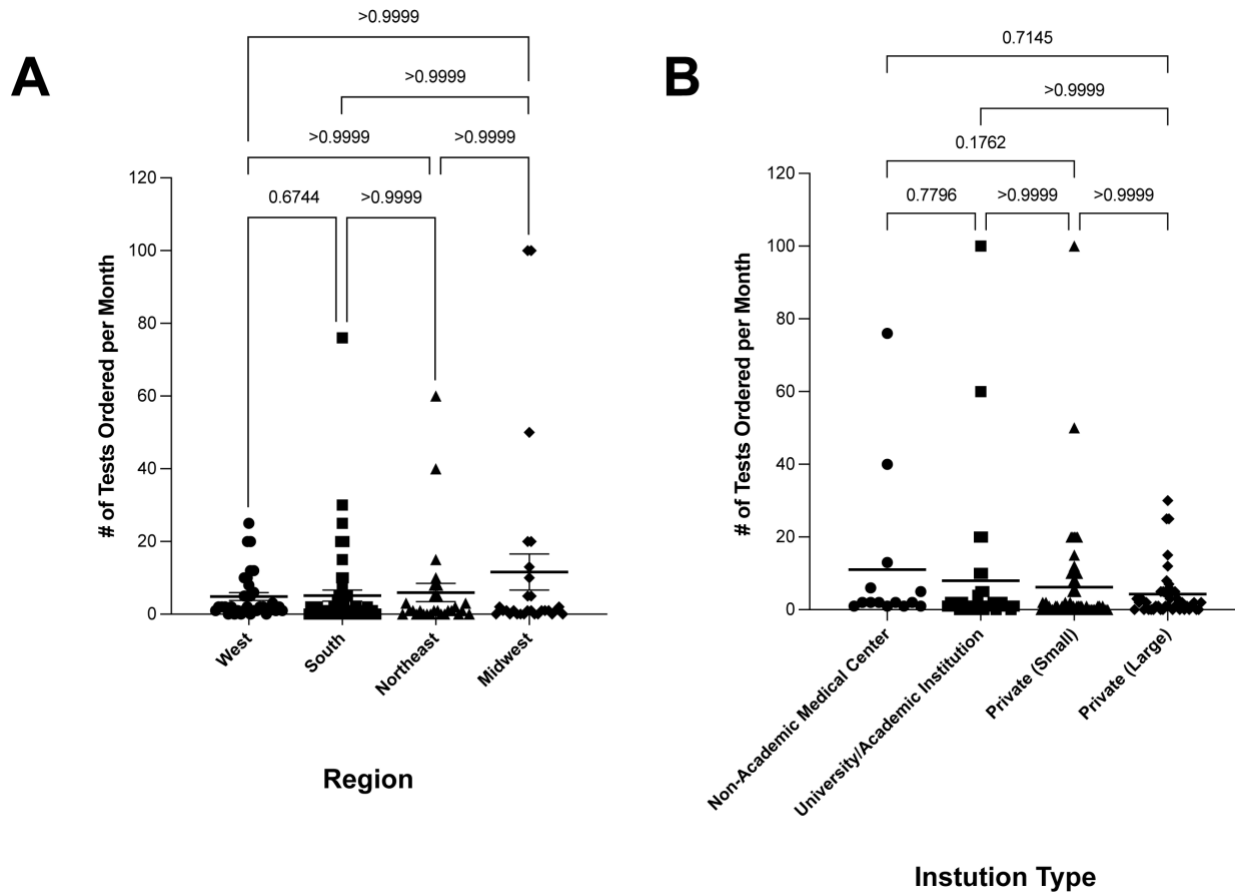

**Table S1: Survey Questions**

\* **Screening Question:** Survey was terminated if any of the following criteria were met:

(1) Specialty = transplant nephrology, pediatric, surgery, (2) Not board certified, (3) Practicing less than 2 years.

| <b>All Respondents</b>                                    | <b>N = 149</b> | <b>(%)</b> |
|-----------------------------------------------------------|----------------|------------|
| <b>1. What is your affiliation?</b>                       |                |            |
| University/academic institution                           | 32             | (21.5)     |
| Non-academic medical center                               | 14             | (9.4)      |
| Private practice, greater than 10 providers               | 43             | (28.9)     |
| Private practice, less than 10 providers                  | 60             | (40.3)     |
| <b>2. What is your specialty?*</b>                        |                |            |
| General nephrology                                        | 149            | (100)      |
| Transplant nephrology                                     | --             | --         |
| Pediatric nephrology                                      | --             | --         |
| Surgery                                                   | --             | --         |
| Other                                                     | --             | --         |
| <b>3. Are you board certified in general nephrology?*</b> |                |            |
|                                                           | 149            | (100)      |
| <b>4. How long have you been practicing Nephrology?*</b>  |                |            |
| < 2 years                                                 | --             | --         |
| ≥ 2 years and < 5 years                                   | 5              | (3.3)      |
| ≥ 5 years and < 10 years                                  | 25             | (16.8)     |
| ≥ 10 years and < 20 years                                 | 69             | (46.3)     |
| ≥ 20 years and < 30 years                                 | 39             | (26.2)     |
| ≥ 30 years                                                | 11             | (7.4)      |
| <b>5. In which state do you currently practice?</b>       |                |            |
| Alabama (South)                                           | 2              | (1.3)      |
| Arizona (West)                                            | 3              | (2.0)      |
| Arkansas (South)                                          | 3              | (2.0)      |
| California (West)                                         | 22             | (14.8)     |

|                              |    |       |
|------------------------------|----|-------|
| Connecticut (Northeast)      | 1  | (0.7) |
| Delaware (South)             | 2  | (1.3) |
| District of Columbia (South) | 1  | (0.7) |
| Florida (South)              | 10 | (6.7) |
| Georgia (South)              | 3  | (2.0) |
| Illinois (Midwest)           | 7  | (4.7) |
| Indiana (Midwest)            | 5  | (3.4) |
| Kansas (Midwest)             | 1  | (0.7) |
| Louisiana (South)            | 3  | (2.0) |
| Maryland (south)             | 2  | (1.3) |
| Massachusetts (Northeast)    | 3  | (2.0) |
| Michigan (Midwest)           | 3  | (2.0) |
| Minnesota (Midwest)          | 2  | (1.3) |
| Mississippi (south)          | 3  | (2.0) |
| Nebraska (Midwest)           | 1  | (0.7) |
| Nevada (West)                | 2  | (1.3) |
| New Jersey (Northeast)       | 8  | (5.4) |
| New York (Northeast)         | 5  | (3.4) |
| North Carolina (South)       | 9  | (6.0) |
| Ohio (Midwest)               | 9  | (6.0) |
| Oklahoma (South)             | 1  | (0.7) |
| Oregon (West)                | 3  | (2.0) |
| Pennsylvania (Northeast)     | 10 | (6.7) |
| Rhode Island (Northeast)     | 1  | (0.7) |
| South Carolina (South)       | 3  | (2.0) |
| Tennessee (South)            | 4  | (2.7) |
| Texas (South)                | 9  | (6.0) |
| Utah (West)                  | 2  | (1.3) |
| Virginia (South)             | 3  | (2.0) |
| Washington (West)            | 2  | (1.3) |
| Wisconsin (Midwest)          | 1  | (0.7) |

---

**6. Who typically refers patients to your office?**

|                        |     |       |
|------------------------|-----|-------|
| Primary care physician | 149 | (100) |
| Other:                 | --  | --    |

**7. How much education on genetics did you receive during your nephrology training?**

|           |     |        |
|-----------|-----|--------|
| None      | 10  | (6.7)  |
| Limited   | 108 | (72.5) |
| Extensive | 31  | (20.8) |

**8. Have your patients asked you about genetic testing?**

|                                  |    |        |
|----------------------------------|----|--------|
| Yes, my patients often ask       | 13 | (8.7)  |
| Yes, but not frequently          | 95 | (63.8) |
| No, my patients have never asked | 41 | (27.5) |

**9. How many unique general nephrology patients do you see in one month?**

|                                  |                 |
|----------------------------------|-----------------|
| <i>Provide a numerical value</i> | Mean (±SD)      |
| Total responses: 149             | 269.7 (± 136.7) |

**10. What % of your patients are in the below stages when they are first referred to you?**

|                                                                           |              |
|---------------------------------------------------------------------------|--------------|
| <i>Provide a numerical value for each category (Total responses: 149)</i> | Mean (±SD)   |
| Stage 1:                                                                  | 5.4 (± 4.4)  |
| Stage 2:                                                                  | 9.1 (± 5.8)  |
| Stage 3a:                                                                 | 22.5 (± 9.6) |
| Stage 3b:                                                                 | 25.7 (± 8.0) |
| Stage 4:                                                                  | 20.7 (± 9.3) |
| Stage 5:                                                                  | 8.6 (± 5.1)  |
| Stage 6/ ESRD:                                                            | 8.1 (± 8.8)  |

**11. Approximately how many genetic tests do you order on average every month?**

|                                  |              |
|----------------------------------|--------------|
| <i>Provide a numerical value</i> | Mean (±SD)   |
| Total responses: 149             | 6.5 (± 15.3) |

**12. Among the genetic tests you order every month, how many on average are for APOL1?**

|                                  |             |
|----------------------------------|-------------|
| <i>Provide a numerical value</i> | Mean (±SD)  |
| Total responses: 149             | 4.3 (± 9.3) |

|                                                         |                |            |
|---------------------------------------------------------|----------------|------------|
| <b>For those who have ordered genetic tests (Users)</b> | <b>N = 107</b> | <b>(%)</b> |
|---------------------------------------------------------|----------------|------------|

| <b>13. What type of genetic testing do you typically order on your adult CKD patients?</b>                                                  |    |        |
|---------------------------------------------------------------------------------------------------------------------------------------------|----|--------|
| Small, targeted panel based on clinical symptoms (e.g. cystic, glomerular nephrolithiasis)                                                  | 53 | (49.5) |
| Expanded panel or full exome to cover all types of disease                                                                                  | 11 | (10.3) |
| A combination of small and expanded panels, depending on the patient                                                                        | 43 | (40.2) |
| <b>14. What % of your adult CKD population has a diagnosis confirmed by genetic testing?</b>                                                |    |        |
| Less than 1%                                                                                                                                | 36 | (33.6) |
| 2-5%                                                                                                                                        | 37 | (34.6) |
| 6-10%                                                                                                                                       | 15 | (14.0) |
| 11-25%                                                                                                                                      | 13 | (12.1) |
| 26-50%                                                                                                                                      | 5  | (4.7)  |
| >50%                                                                                                                                        | 1  | (0.9)  |
| <b>15. Have the results of a genetic test changed how you manage your patient?</b>                                                          |    |        |
| Yes, often                                                                                                                                  | 18 | (16.8) |
| Yes, sometimes                                                                                                                              | 62 | (57.9) |
| Yes, but rarely                                                                                                                             | 18 | (16.8) |
| No, clinical management would not change                                                                                                    | 9  | (8.4)  |
| <b>16. In which clinical scenarios do you believe genetic testing has the most value?<br/>(can select more than 1 option)</b>               |    |        |
| All patients with CKD                                                                                                                       | 12 | (11.2) |
| Patients with unknown etiology of CKD                                                                                                       | 74 | (69.2) |
| Specific clinical diagnoses                                                                                                                 | 80 | (74.8) |
| Pediatric patients                                                                                                                          | 27 | (25.2) |
| <b>16a. Which of the specific clinical diagnoses do you believe genetic testing has the most value?<br/>(can select more than 1 option)</b> |    |        |
| Cystic                                                                                                                                      | 74 | (69.2) |
| Glomerular                                                                                                                                  | 60 | (56.1) |
| Electrolyte abnormalities                                                                                                                   | 39 | (36.4) |
| Nephrolithiasis                                                                                                                             | 33 | (30.8) |
| CAKUT                                                                                                                                       | 29 | (27.1) |
| Hypertension                                                                                                                                | 14 | (13.1) |

|                            |         |        |
|----------------------------|---------|--------|
| Diabetic nephropathy       | 8       | (7.5)  |
| Tubulointerstitial disease | 38      | (35.5) |
| Other (specify)            | 1 (TMA) | (0.9)  |

**17. How would you rate each of the following as barriers to ordering genetic testing?**

| <i>Use a scale from 1 (Not a Barrier) to 5 (Significant Barrier).</i>               | 1  | 2  | 3  | 4  | 5  |
|-------------------------------------------------------------------------------------|----|----|----|----|----|
| Lack of proven clinical utility                                                     | 3  | 22 | 36 | 35 | 11 |
| Concern about cost to the patient                                                   | 3  | 4  | 15 | 36 | 49 |
| Availability/ease of testing                                                        | 7  | 7  | 28 | 30 | 35 |
| Lack of knowledge on interpreting the results                                       | 8  | 25 | 31 | 34 | 9  |
| Lack of access to genetics experts to assist in ordering and results interpretation | 13 | 15 | 24 | 35 | 20 |
| Other:                                                                              | 1  | 1  | 5  | 2  | -- |

**18. How important is each type of support to make it easier to order genetic testing for your patients?**

| <i>Use a scale from 1 (Not Important) to 5 (Extremely Important).</i>                | 1  | 2  | 3  | 4  | 5  |
|--------------------------------------------------------------------------------------|----|----|----|----|----|
| Access to genetic counselors for myself and my patient(s)                            | 3  | 5  | 21 | 50 | 28 |
| Easy ordering process                                                                | 1  | 3  | 17 | 42 | 44 |
| Detailed results with implications for the patient and/or their biological relatives | -- | 2  | 18 | 38 | 49 |
| Insurance/billing support                                                            | -- | 4  | 16 | 41 | 46 |
| Other:                                                                               | -- | -- | -- | 2  | 1  |

**For those who have NOT ordered genetic tests (non-users) N = 42 (%)**

**19. In which clinical scenarios do you believe genetic testing has the most value?**

*(can select more than 1 option)*

|                                       |    |        |
|---------------------------------------|----|--------|
| All patients with CKD                 | -- | --     |
| Patients with unknown etiology of CKD | 16 | (38.1) |
| Specific clinical diagnoses           | 36 | (85.7) |
| Pediatric patients                    | 13 | (30.9) |
| I don't see value in genetic testing  | 2  | (4.8)  |

**19a. Which of the specific clinical diagnoses do you believe genetic testing has the most value? (can select more than 1 option)**

|                            |    |        |
|----------------------------|----|--------|
| Cystic                     | 32 | (76.2) |
| Glomerular                 | 22 | (52.4) |
| Electrolyte abnormalities  | 20 | (47.6) |
| Nephrolithiasis            | 9  | (21.4) |
| CAKUT                      | 6  | (14.3) |
| Hypertension               | 4  | (9.5)  |
| Diabetic nephropathy       | -- | --     |
| Tubulointerstitial disease | 8  | (19.0) |
| Other (specify)            | -- | --     |

**20. How would you rate each of the following as barriers to ordering genetic testing?**

| <i>Use a scale from 1 (Not a Barrier) to 5 (Significant Barrier).</i>               | 1 | 2  | 3  | 4  | 5  |
|-------------------------------------------------------------------------------------|---|----|----|----|----|
| Lack of proven clinical utility                                                     | 6 | 3  | 10 | 17 | 6  |
| Concern about cost to the patient                                                   | 1 | 4  | 2  | 6  | 29 |
| Availability/ease of testing                                                        | 1 | 1  | 3  | 13 | 24 |
| Lack of knowledge on interpreting the results                                       | 3 | 10 | 9  | 14 | 6  |
| Lack of access to genetics experts to assist in ordering and results interpretation | 3 | 3  | 9  | 18 | 9  |
| Other:                                                                              | 2 | -- | 1  | 1  | 2  |

**20a. How important would each type of support be to make it easier to order genetic testing for your patients?**

| <i>Use a scale from 1 (Not Important) to 5 (Extremely Important).</i>                | 1  | 2  | 3  | 4  | 5  |
|--------------------------------------------------------------------------------------|----|----|----|----|----|
| Access to genetic counselors for myself and my patient(s)                            | 1  | 2  | 4  | 12 | 23 |
| Easy ordering process                                                                | -- | -- | 3  | 14 | 25 |
| Detailed results with implications for the patient and/or their biological relatives | -- | -- | 3  | 10 | 29 |
| Insurance/billing support                                                            | -- | -- | 4  | 9  | 29 |
| Other:                                                                               | 1  | -- | -- | -- | -- |

|                        |                |            |
|------------------------|----------------|------------|
| <b>All Respondents</b> | <b>N = 149</b> | <b>(%)</b> |
|------------------------|----------------|------------|

**21. What education would you like to receive on genetic testing and CKD?**

| <i>(can select more than 1 option)</i>       |     |        |
|----------------------------------------------|-----|--------|
| I need a refresher on genetic causes of CKD. | 100 | (67.1) |

|                                                                                                                                     |     |        |
|-------------------------------------------------------------------------------------------------------------------------------------|-----|--------|
| I need to know how to talk to my patients about the options for testing and the result implications.                                | 81  | (54.4) |
| Resources to help educate my patients on genetic causes of CKD and family planning needs                                            | 103 | (69.1) |
| None                                                                                                                                | 5   | (3.4)  |
| <b>22. What kinds of patient education about genetic kidney disease would you find most useful? (can select more than 1 option)</b> |     |        |
| Basics of genetic kidney disease                                                                                                    | 107 | (71.8) |
| Implications for family; such as living related donors, family planning                                                             | 126 | (84.6) |
| Details on how to interpret results of genetic tests                                                                                | 111 | (74.5) |
| Privacy of genetic information                                                                                                      | 66  | (44.3) |
| Insurance implications of a positive finding                                                                                        | 89  | (59.7) |



**Table S2: Genetic Testing Use Patterns in Survey Respondents**

| <b>Institution Type</b>                 | <b>N (%)</b> | <b>Users (N=107)</b> | <b>Non-Users (N=42)</b> |
|-----------------------------------------|--------------|----------------------|-------------------------|
| University/Academic Institution         | 32 (21.5)    | 25 (23.4)            | 7 (16.7)                |
| Non-academic medical center             | 14 (9.4)     | 14 (13.1)            | 0 (0.0)                 |
| Large private practice (> 10 providers) | 43 (28.8)    | 30 (28.0)            | 13 (31.0)               |
| Small private practice (< 10 providers) | 60 (40.3)    | 38 (35.5)            | 22 (52.4)               |
| <b>Region</b>                           |              |                      |                         |
| Midwest                                 | 29 (19.5)    | 20 (18.7)            | 9 (21.4)                |
| Northeast                               | 28 (18.8)    | 19 (17.8)            | 9 (21.4)                |
| South                                   | 58 (38.9)    | 39 (36.4)            | 19 (45.2)               |
| West                                    | 34 (22.8)    | 29 (27.12)           | 5 (12.0)                |
| <b>Genetics Education</b>               |              |                      |                         |
| None                                    | 10 (6.7)     | 2 (1.9)              | 8 (19.0)                |
| Limited                                 | 108 (72.5)   | 75 (70.1)            | 33 (78.6)               |
| Extensive                               | 31 (20.8)    | 30 (28.0)            | 1 (2.4)                 |

**Table S3. Perceived barriers to genetic testing (Genetics Education Level)**

|                                       | Users (N=107)   |                      |                        | Non-Users (N=42) |                      |                       |
|---------------------------------------|-----------------|----------------------|------------------------|------------------|----------------------|-----------------------|
|                                       | None<br>2 (1.9) | Limited<br>75 (70.1) | Extensive<br>30 (28.0) | None<br>8 (19.0) | Limited<br>33 (78.6) | Extensive<br>1 (2.4%) |
| <b>Barriers</b>                       | <b>N (%)</b>    |                      |                        |                  |                      |                       |
| cost of testing                       | 2 (100.0)       | 38 (50.7)            | 9 (30.0)               | 4 (50.0)         | 25 (75.8)            | 0 (0.0)               |
| availability/ease of testing          | 1 (50.0)        | 26 (34.7)            | 8 (26.7)               | 4 (50.0)         | 20 (60.6)            | 0 (0.0)               |
| access to genetics experts            | 1 (50.0)        | 15 (20.0)            | 4 (13.3)               | 2 (25.0)         | 7 (21.2)             | 0 (0.0)               |
| lack of proven clinical utility       | 0 (0.0)         | 8 (10.7)             | 3 (10.0)               | 2 (25.0)         | 4 (12.1)             | 0 (0.0)               |
| knowledge about result interpretation | 1 (50.0)        | 7 (9.3)              | 1 (3.3)                | 2 (25.0)         | 4 (12.1)             | 0 (0.0)               |
